# Supplementary material for: Development and Validation of a Prognostic Signature for Malignant Pleural Mesothelioma
Source: Front Oncol. 2019 Feb 15;9:78. doi: 10.3389/fonc.2019.00078 (PMC6384238; doi:10.3389/fonc.2019.00078)
Supplement: Table S1 — Survival-associated gene signature. [file Table_1.XLSX]

## Sheet: 工作表1
geneid	Symbol	hr	z_score	pvalue	fdr_bh
64151	NCAPG	1.02725	4.24992	2.14e-05	0.0252631
3002	GZMB	1.01985	4.21806	2.46e-05	0.0252631
55355	HJURP	1.02651	4.19192	2.77e-05	0.0252631
146909	KIF18B	1.01915	4.08817	4.35e-05	0.0297829
991	CDC20	1.01857	3.98978	6.61e-05	0.0335337
79801	SHCBP1	1.0285	3.95287	7.72e-05	0.0335337
29127	RACGAP1	1.01827	3.91249	9.13e-05	0.0335337
11157	LSM6	1.02592	3.89572	9.79e-05	0.0335337
1164	CKS2	1.00923	3.71965	0.000199502	0.0607372
10403	NDC80	1.02771	3.67701	0.000235979	0.061732
3832	KIF11	1.03321	3.66449	0.000247829	0.061732
5697	PYY	1.04961	3.60064	0.000317438	0.0724817
2745	GLRX	1.00739	3.50824	0.000451082	0.0950743
891	CCNB1	1.00776	3.47956	0.000502241	0.0982958
5694	PSMB6	1.0125	3.45728	0.000545649	0.0986333
51316	PLAC8	1.00771	3.44269	0.000575961	0.0986333
983	CDK1	1.01554	3.39743	0.000680218	0.103618
51400	PPME1	1.00656	3.39724	0.0006807	0.103618
3838	KPNA2	1.0042	3.35766	0.000786064	0.106814
3251	HPRT1	1.00769	3.34959	0.000809324	0.106814
6241	RRM2	1.00817	3.34641	0.00081865	0.106814
56920	SEMA3G	1.02128	3.29661	0.000978589	0.121879
