# Supplementary material for: Development and Validation of a Prognostic Signature for Malignant Pleural Mesothelioma
Source: Front Oncol. 2019 Feb 15;9:78. doi: 10.3389/fonc.2019.00078 (PMC6384238; doi:10.3389/fonc.2019.00078)
Supplement: Table S3 — GO enrichment results. [file Table_3.XLS]

## Sheet: ego_CC
ID	Description	GeneRatio	BgRatio	pvalue	p.adjust	qvalue	geneID	Count
GO:0030055	cell-substrate junction	122/2643	401/18698	1.95845e-17	1.43162e-14	9.97777e-15	1072/6141/6193/6143/6133/4869/6204/3190/3927/5216/7534/5034/3313/10971/2934/6129/6176/8826/6209/10525/6181/811/6132/527/6386/5479/10096/301/6175/7052/6222/3675/10146/2273/2195/4659/3716/4082/2037/5756/3315/9019/567/10095/5782/8500/6522/8895/1785/3685/8754/5605/402/102/6223/976/2274/391/1000/7739/8496/88/8936/8470/3984/2321/3691/23092/1605/7010/9754/10672/1466/8394/4179/5747/10109/4988/83481/22800…	122
GO:0005925	focal adhesion	119/2643	393/18698	7.30294e-17	2.66923e-14	1.86033e-14	1072/6141/6193/6143/6133/4869/6204/3190/3927/5216/7534/5034/3313/10971/2934/6129/6176/8826/6209/10525/6181/811/6132/527/6386/5479/10096/301/6175/7052/6222/3675/10146/2273/2195/4659/3716/4082/2037/5756/3315/9019/567/10095/5782/8500/6522/8895/1785/3685/8754/5605/402/102/6223/976/2274/391/1000/7739/8496/88/8936/8470/3984/2321/23092/1605/7010/9754/10672/1466/8394/4179/5747/10109/4988/22800/6641/2923/…	119
GO:0005924	cell-substrate adherens junction	119/2643	396/18698	1.38034e-16	3.36343e-14	2.34415e-14	1072/6141/6193/6143/6133/4869/6204/3190/3927/5216/7534/5034/3313/10971/2934/6129/6176/8826/6209/10525/6181/811/6132/527/6386/5479/10096/301/6175/7052/6222/3675/10146/2273/2195/4659/3716/4082/2037/5756/3315/9019/567/10095/5782/8500/6522/8895/1785/3685/8754/5605/402/102/6223/976/2274/391/1000/7739/8496/88/8936/8470/3984/2321/23092/1605/7010/9754/10672/1466/8394/4179/5747/10109/4988/22800/6641/2923/…	119
GO:0060205	cytoplasmic vesicle lumen	92/2643	338/18698	1.67136e-10	2.41358e-08	1.68216e-08	3608/3326/1938/351/6282/3146/2934/5695/2950/10525/5708/9798/10694/3959/811/6386/226/5701/5315/1460/6414/302/51097/1727/10447/567/3074/10576/7450/5718/1432/6279/7077/348/6280/8836/88/1774/3614/9535/240/5126/1915/4332/25797/2219/80184/1675/22915/1511/2157/6283/3827/6036/3273/2588/5199/5196/10808/1669/55832/10075/2821/6709/87/7520/5036/23191/10383/203068/3043/5919/7276/5478/1778/10092/10213/23526/60…	92
GO:0101002	ficolin-1-rich granule	60/2643	185/18698	1.70414e-10	2.41358e-08	1.68216e-08	3608/3326/1938/1832/3146/2934/8655/5695/2950/5708/1508/10694/527/226/5701/5315/327/1315/1460/10159/5547/5236/5718/1432/22918/7077/3614/9535/240/10875/1915/4332/2357/25797/2219/1675/3848/1378/55832/2204/10075/2821/5879/3958/3043/6556/84658/2358/5478/23352/10092/10213/23114/4282/51719/56888/51143/29099/51071/79930	60
GO:0031983	vesicle lumen	92/2643	339/18698	1.98105e-10	2.41358e-08	1.68216e-08	3608/3326/1938/351/6282/3146/2934/5695/2950/10525/5708/9798/10694/3959/811/6386/226/5701/5315/1460/6414/302/51097/1727/10447/567/3074/10576/7450/5718/1432/6279/7077/348/6280/8836/88/1774/3614/9535/240/5126/1915/4332/25797/2219/80184/1675/22915/1511/2157/6283/3827/6036/3273/2588/5199/5196/10808/1669/55832/10075/2821/6709/87/7520/5036/23191/10383/203068/3043/5919/7276/5478/1778/10092/10213/23526/60…	92
GO:0034774	secretory granule lumen	86/2643	321/18698	1.52831e-09	1.596e-07	1.11234e-07	3608/3326/1938/351/6282/3146/2934/5695/2950/5708/9798/10694/3959/6386/226/5701/5315/1460/6414/302/51097/1727/10447/567/3074/10576/7450/5718/1432/6279/7077/6280/8836/88/1774/3614/9535/240/5126/1915/4332/25797/2219/80184/1675/22915/1511/2157/6283/3827/6036/3273/2588/5199/5196/1669/55832/10075/2821/6709/87/7520/5036/23191/10383/203068/5919/7276/5478/1778/10092/10213/23526/6093/7114/2/4282/51719/2909…	86
GO:0043209	myelin sheath	53/2643	164/18698	2.24217e-09	2.04878e-07	1.42791e-07	4735/821/2752/5245/3313/2934/2782/3329/10376/3710/5315/506/7345/6624/4830/302/7384/10576/523/6812/6616/1739/596/9118/51090/6715/1915/11076/445/2821/2923/7430/22948/10383/4191/5584/5376/10476/1737/1272/7417/3309/7416/4642/256987/83700/23114/5898/1743/79784/4705/4282/30845	53
GO:0042470	melanosome	39/2643	106/18698	4.99427e-09	3.65081e-07	2.54445e-07	3326/821/7534/5034/1200/5901/813/1508/10575/191/6386/5479/6184/2040/6513/302/8836/9145/5868/10672/10130/5861/2923/5879/9601/682/5862/23385/6509/6490/7531/23193/3309/2194/9905/534/7184/51393/9367	39
GO:0048770	pigment granule	39/2643	106/18698	4.99427e-09	3.65081e-07	2.54445e-07	3326/821/7534/5034/1200/5901/813/1508/10575/191/6386/5479/6184/2040/6513/302/8836/9145/5868/10672/10130/5861/2923/5879/9601/682/5862/23385/6509/6490/7531/23193/3309/2194/9905/534/7184/51393/9367	39
GO:0098589	membrane region	81/2643	314/18698	2.8647e-08	1.90372e-06	1.32681e-06	8717/1938/351/5230/8826/6281/6386/2771/2040/10376/999/6513/9368/5420/302/26509/1445/1739/8772/2817/287/1000/7133/920/1525/2149/962/1910/51090/1901/4118/657/10630/9472/5348/1605/284/5868/6517/7010/6531/7143/7124/7048/4923/6532/4179/7132/871/1268/4988/5740/5024/3753/7430/682/7514/5175/203068/2824/23299/6548/7035/6404/27040/2534/7096/1136/6530/1272/7416/5595/23673/4642/23213/23180/7535/28956/79870/8…	81
GO:0005635	nuclear envelope	107/2643	455/18698	4.14496e-08	2.52497e-06	1.75979e-06	11335/51493/351/5901/9798/811/6386/10527/3838/1434/3710/327/307/27101/9805/6240/7175/1717/26509/6249/9821/9972/27243/25/1019/1861/8658/55308/54788/4085/7112/6653/596/4258/1910/11322/240/9118/6622/5144/9284/5002/9472/598/3204/9127/1063/5593/489/358/3842/6396/6683/81565/9538/5024/4904/142/7514/203068/23299/5058/26031/23468/9378/2627/8815/1773/54498/5987/10128/3843/23190/5595/25777/11260/26057/92140…	107
GO:0045121	membrane raft	78/2643	302/18698	4.86288e-08	2.73443e-06	1.90577e-06	8717/1938/351/5230/8826/6281/6386/2771/2040/10376/999/6513/9368/5420/302/26509/1445/1739/8772/2817/287/1000/7133/920/1525/2149/962/1910/51090/1901/4118/657/10630/9472/5348/1605/284/5868/6517/7010/6531/7143/7124/7048/4923/6532/7132/871/1268/4988/5740/5024/3753/7430/682/5175/203068/2824/6548/7035/6404/27040/2534/7096/1136/6530/1272/7416/5595/23673/4642/23213/23180/7535/28956/79870/81930/23603	78
GO:0098857	membrane microdomain	78/2643	303/18698	5.65635e-08	2.95342e-06	2.0584e-06	8717/1938/351/5230/8826/6281/6386/2771/2040/10376/999/6513/9368/5420/302/26509/1445/1739/8772/2817/287/1000/7133/920/1525/2149/962/1910/51090/1901/4118/657/10630/9472/5348/1605/284/5868/6517/7010/6531/7143/7124/7048/4923/6532/7132/871/1268/4988/5740/5024/3753/7430/682/5175/203068/2824/6548/7035/6404/27040/2534/7096/1136/6530/1272/7416/5595/23673/4642/23213/23180/7535/28956/79870/81930/23603	78
GO:1904813	ficolin-1-rich granule lumen	41/2643	124/18698	6.94583e-08	3.38493e-06	2.35914e-06	3608/3326/1938/3146/2934/5695/2950/5708/1508/10694/226/5701/5315/327/1460/5236/5718/1432/7077/3614/9535/240/10875/1915/4332/25797/2219/1675/3848/55832/10075/2821/3043/5478/10092/10213/4282/51719/56888/29099/51071	41
GO:1905368	peptidase complex	32/2643	92/18698	5.13119e-07	2.27256e-05	1.58387e-05	5695/5720/5708/5710/10197/5886/9491/5701/5887/9789/5704/5691/9097/5682/9690/3315/5692/5718/7466/27429/5685/5711/5698/2152/5694/5696/10474/10213/10629/56943/80227/112869	32
GO:1905369	endopeptidase complex	26/2643	67/18698	5.28503e-07	2.27256e-05	1.58387e-05	5695/5720/5708/5710/10197/5886/9491/5701/5887/5704/5691/9097/5682/9690/3315/5692/5718/7466/27429/5685/5711/5698/5694/5696/10213/80227	26
GO:0015629	actin cytoskeleton	108/2643	487/18698	8.08091e-07	3.28175e-05	2.28723e-05	1072/3190/3927/11337/2934/8826/10552/226/10096/301/999/5358/6513/6897/55752/10627/9368/1809/25932/6624/4659/3880/4082/2037/5756/10095/5236/5782/2909/25/9817/11073/2634/1627/4643/10611/3898/9743/1000/10788/7739/25802/88/5074/7169/8936/11258/8470/2321/6622/2039/4620/1915/7125/8997/22885/4919/5463/5868/395/9696/9735/4983/27/7010/5747/10109/7273/6709/7430/87/5879/3936/10602/7171/9026/5058/10391/4635/…	108
GO:0005874	microtubule	93/2643	408/18698	1.35433e-06	5.21062e-05	3.63156e-05	11337/8655/4926/8826/10574/7756/10694/10575/27230/10376/908/7283/6904/1155/6907/10576/6249/3799/332/10381/1785/5605/6903/10982/1739/403/6760/23303/827/10059/3800/10615/983/8514/9638/4296/10426/6905/22911/4137/7280/11258/2801/3832/889/2622/11104/4920/11076/9735/10808/22981/6683/81565/11043/22948/81631/10383/203068/84617/9576/6795/23766/10128/1781/1778/25941/57509/4131/140609/23271/283638/23116/111…	93
GO:0000502	proteasome complex	25/2643	66/18698	1.47745e-06	5.29407e-05	3.68972e-05	5695/5720/5708/5710/10197/5886/9491/5701/5887/5704/5691/9097/5682/9690/3315/5692/5718/7466/5685/5711/5698/5694/5696/10213/80227	25
GO:0042383	sarcolemma	39/2643	128/18698	1.52087e-06	5.29407e-05	3.68972e-05	301/6513/633/302/52/3880/1739/287/1000/6640/8910/3908/3764/9472/5348/286/1605/6263/6517/3759/358/783/4988/776/3762/10060/6641/7430/682/3856/1292/6548/6833/1291/23336/113146/54407/28965/57716	39
GO:0070820	tertiary granule	46/2643	164/18698	2.43031e-06	8.07524e-05	5.62808e-05	5337/3608/1832/8655/527/226/2040/1315/10159/5547/567/5236/6616/102/4893/22918/7077/8514/963/8836/11322/2357/25797/945/1378/5199/634/2204/25840/6709/5879/23191/3958/3043/6813/6556/84658/2358/961/23352/23114/51143/138050/28956/56954/79930	46
GO:0005911	cell-cell junction	97/2643	440/18698	3.78979e-06	0.000120449	8.39477e-05	1072/351/1832/6282/8826/7317/10096/301/999/6513/25932/6624/5420/2195/302/3875/5756/6904/1019/1445/5605/1739/1627/9267/287/51421/117178/4643/10611/1001/5797/5493/963/1000/1525/5097/2264/4620/1003/4690/889/2701/10791/3815/9071/9472/5348/1605/794/1004/8631/914/5583/7855/9223/634/7010/3759/28513/207/1009/5318/83481/51599/8647/87/3856/6548/23037/4345/5058/5584/11187/27040/5376/1006/3702/92140/23384/23…	97
GO:0005819	spindle	76/2643	324/18698	4.05565e-06	0.000123528	8.60935e-05	4735/11335/10899/4869/3550/351/8655/4926/7756/10951/7283/7175/3315/6907/23568/332/1432/8658/11073/403/991/827/27339/10615/983/4085/7013/10426/701/11258/2801/3832/5303/7272/8556/11104/9735/26206/207/1063/6683/81565/6188/9126/6795/10474/57509/23384/140609/26112/23331/11083/11127/891/123872/79184/51143/9055/51164/51203/26586/10460/55201/10112/55012/55112/79801/1894/114327/259266/80097/55755/55689/81…	76
GO:0098687	chromosomal region	80/2643	347/18698	4.61226e-06	0.000134862	9.39929e-05	4735/11335/5885/10728/8655/6612/7756/5111/9184/10951/4172/4659/9878/1786/7175/4174/1616/4175/6249/332/4171/5525/8658/6672/4683/10615/9770/983/5000/4085/7013/2332/2067/701/10403/11258/2237/7272/4999/10320/3181/1111/9735/1063/6396/81565/1642/7520/142/5591/7514/4176/55651/9126/8563/23468/545/328/6795/4173/25777/23028/23279/23310/8363/891/84148/147841/51143/51164/55055/9985/64151/55355/79019/57122/79…	80
GO:0030667	secretory granule membrane	71/2643	303/18698	8.61842e-06	0.000228095	0.000158971	5337/10959/1832/9761/8655/8826/527/10970/2040/3710/1315/10159/5547/8895/5066/3685/6616/102/4893/3709/22918/976/391/8514/963/10788/7133/2212/4126/2215/9145/11322/55/6622/6402/2357/6403/945/1378/634/9522/10326/3579/3577/8560/4179/353189/2204/5879/1650/682/23385/3958/5175/6813/932/6556/84658/2358/961/23352/23317/23114/51143/138050/3163/28956/54509/51365/79930/222487	71
GO:0030120	vesicle coat	21/2643	55/18698	8.69585e-06	0.000228095	0.000158971	163/1173/22872/9276/372/11316/1315/56681/9871/164/10016/10484/1212/6396/1314/23423/9026/83988/22818/22820/553115	21
GO:0030135	coated vesicle	66/2643	276/18698	8.73686e-06	0.000228095	0.000158971	10959/351/163/1173/3329/22872/9276/372/6721/11316/1315/56681/1889/9685/567/7450/1785/9871/10897/4643/3998/164/348/10016/920/22876/11018/57030/10484/2801/65082/7039/1212/4920/8120/4036/2157/54732/7474/5868/7855/154/6517/9522/8674/6396/554/1314/23423/23062/9026/2890/2535/51124/83988/10228/57214/3105/3120/22818/22820/553115/90522/50489/1129/23677	66
GO:0031965	nuclear membrane	71/2643	304/18698	9.71599e-06	0.00024491	0.000170691	11335/6386/3710/327/307/9805/7175/1717/26509/9821/9972/25/1019/1861/8658/55308/54788/596/1910/11322/240/9118/6622/5144/9284/9472/598/3204/9127/5593/489/358/3842/6683/9538/5024/4904/7514/5058/26031/9378/2627/54498/5987/10128/3843/25777/26057/92140/2597/23306/23108/51155/51495/79188/55914/55706/79004/59343/4710/80013/80764/57122/55151/8089/6783/28959/23742/51131/80789/29956	71
GO:0030662	coated vesicle membrane	45/2643	171/18698	1.88871e-05	0.000452162	0.000315137	10959/163/1173/22872/9276/372/6721/11316/1315/56681/567/9871/3998/164/348/10016/920/57030/10484/7039/1212/4920/8120/4036/7474/5868/7855/154/8674/6396/554/1314/23423/9026/2890/2535/83988/57214/3105/3120/22818/22820/553115/50489/1129	45
GO:0030496	midbody	44/2643	166/18698	1.91751e-05	0.000452162	0.000315137	4735/2079/10899/5901/8826/9798/6867/2771/6513/25932/302/51097/23568/332/1785/9817/403/9101/10190/10615/983/9727/11258/11104/1063/6683/6795/3309/23111/26112/23331/5911/5898/7184/54902/9055/55165/10640/10112/79801/1894/259266/79720/29127	44
GO:0030117	membrane coat	30/2643	98/18698	2.1334e-05	0.000472581	0.000329368	163/1173/22872/9276/372/11316/1315/56681/27243/9871/1176/164/10016/10484/65082/1212/8120/8943/6396/1314/23423/23062/9026/83988/23339/26088/22818/22820/553115/23431	30
GO:0048475	coated membrane	30/2643	98/18698	2.1334e-05	0.000472581	0.000329368	163/1173/22872/9276/372/11316/1315/56681/27243/9871/1176/164/10016/10484/65082/1212/8120/8943/6396/1314/23423/23062/9026/83988/23339/26088/22818/22820/553115/23431	30
GO:0031252	cell leading edge	84/2643	385/18698	2.46443e-05	0.000529852	0.000369283	1072/351/6282/2934/468/8826/10096/378/999/9368/1809/6624/4830/5420/2195/302/7283/5756/6249/23647/25/1785/3685/117178/5797/1000/10788/4137/8936/8470/3984/8910/5141/10630/1915/3691/286/1605/22885/5868/9079/9750/9748/8394/5747/10109/4988/81565/3749/6506/7430/87/5879/6188/3936/23191/10006/6548/9459/9026/5058/5584/2890/2191/10092/4642/23526/6093/23286/57608/8844/348110/6277/9578/59338/11275/79574/5560…	84
GO:0000775	chromosome, centromeric region	49/2643	194/18698	2.69232e-05	0.00056231	0.000391904	4735/11335/5885/8655/6612/7756/9184/10951/4659/1786/7175/1616/6249/332/5525/8658/10615/9770/4085/2332/701/10403/11258/7272/4999/10320/9735/1063/6396/81565/7514/9126/23468/6795/23279/23310/891/84148/147841/51143/51164/55055/9985/64151/55355/79019/57122/79682/81930	49
GO:0005840	ribosome	58/2643	242/18698	2.77822e-05	0.000564132	0.000393175	11224/6141/6193/6143/6133/821/6194/1938/6204/6129/6176/6209/6159/6181/6132/27230/6175/6222/6238/55854/740/6223/2332/63931/5610/78988/6622/4690/1981/6188/6146/11222/7818/55651/328/116832/6157/6205/6165/6150/55037/28977/51065/29088/51021/28998/28985/79590/54998/51650/51121/51318/51373/65003/51023/51154/64960/63875	58
GO:0033267	axon part	78/2643	353/18698	2.99438e-05	0.000591593	0.000412313	351/2752/8655/8826/8239/7345/1809/3675/6624/3315/3799/66008/1785/6812/1861/10409/1176/6616/1739/790/1627/10497/23303/7077/8514/7133/9638/2332/1525/4137/9145/6622/5217/283/286/1605/794/8120/4919/10874/5868/116/4983/57447/8943/4915/4923/6683/1268/81565/3749/5024/6506/10236/23191/10006/23208/2890/4653/7531/8829/1006/9001/10092/4642/26053/10228/81544/23114/1131/2901/79784/51393/26230/55118/81551/1129…	78
GO:0034709	methylosome	8/2643	12/18698	4.58274e-05	0.000881574	0.000614417	2079/6633/6635/6636/6637/6628/1207/10419	8
GO:0000776	kinetochore	36/2643	133/18698	6.58734e-05	0.0012347	0.000860533	4735/8655/6612/7756/9184/4659/7175/6249/332/10615/9770/4085/701/10403/11258/7272/4999/9735/1063/6396/81565/7514/23468/23279/891/84148/147841/51143/51164/55055/9985/55355/79019/57122/79682/81930	36
GO:0042581	specific granule	41/2643	160/18698	8.32413e-05	0.00152123	0.00106023	5337/3608/9761/10970/2040/1182/567/3685/6616/102/22918/7077/8514/963/7133/8836/1774/11322/25797/80184/945/5199/634/9522/1669/8560/353189/2204/6709/23191/6813/306/932/2358/961/23352/138050/3163/28956/56954/222487	41
GO:0150034	distal axon	61/2643	268/18698	8.77687e-05	0.00154023	0.00107347	351/2752/8826/8239/1809/3675/6624/3799/66008/1785/6812/1861/10409/6616/790/1627/10497/7077/8514/9638/2332/1525/4137/9145/6622/5217/283/794/4919/10874/5868/116/4983/57447/8943/4915/4923/1268/81565/3749/5024/10236/23191/10006/23208/7531/8829/1006/10092/26053/10228/81544/1131/2901/79784/51393/26230/55118/81551/1129/57698	61
GO:0019897	extrinsic component of plasma membrane	43/2643	171/18698	9.05922e-05	0.00154023	0.00107347	2782/4926/2778/8826/6281/301/2771/999/302/3716/25/1445/6616/5652/9101/9267/5996/1001/8514/1000/2332/2791/1003/2786/2219/2769/1004/27/8787/28513/10672/1009/5747/488/2534/9628/1006/3702/7535/6277/408/55359/29127	43
GO:0034663	endoplasmic reticulum chaperone complex	7/2643	10/18698	9.06016e-05	0.00154023	0.00107347	5034/10525/5479/10130/3309/7184/54431	7
GO:0005788	endoplasmic reticulum lumen	66/2643	297/18698	9.89999e-05	0.00164475	0.00114632	821/351/4924/5034/5589/10956/813/8404/10525/9403/3895/811/5479/10970/5955/567/1277/1861/11098/102/4189/7466/1289/348/1000/920/412/1301/1462/1356/10232/3698/1605/2157/1300/7474/3827/5199/64714/5033/10130/871/8858/54361/2923/9601/80781/1292/2719/6696/652/23193/3309/1291/1287/7184/51280/10695/55741/55214/56034/79070/2266/79642/80267/54431	66
GO:0005741	mitochondrial outer membrane	44/2643	178/18698	0.000115718	0.00187978	0.00131012	572/9804/4830/11331/2181/1727/2180/22877/10059/4891/10058/9823/10651/1374/596/4129/8936/5366/4128/8564/1386/597/598/1610/55669/518/1268/7419/599/8408/6663/4653/4580/26056/7417/7416/23111/91137/91543/51566/8303/51024/55139/54996	44
GO:0005813	centrosome	99/2643	490/18698	0.00012139	0.00192905	0.00134446	10899/4869/8655/4926/468/9798/10694/10575/2771/1108/5111/10856/9261/4172/25932/4830/3875/4659/4082/5682/7283/6904/10769/6249/23568/5525/6566/1785/9768/4089/8658/402/403/9133/5567/9475/991/1869/10190/117178/10615/983/9820/9638/4296/10426/9727/23637/10403/11258/5144/7020/4999/11020/10046/80184/8556/1111/9696/598/3161/1063/6103/81565/22948/1069/23299/6509/328/6795/9001/1781/1778/23352/585/23271/2336…	99
GO:0031968	organelle outer membrane	48/2643	201/18698	0.000143532	0.00223238	0.00155586	572/9804/3710/4830/11331/2181/1717/1727/2180/22877/10059/4891/10058/9823/10651/1374/596/4129/8936/5366/4128/6622/8564/1386/597/598/1610/55669/518/1268/7419/599/8408/6663/4653/4580/26056/10128/7417/7416/23111/91137/91543/51566/8303/51024/55139/54996	48
GO:0000784	nuclear chromosome, telomeric region	33/2643	124/18698	0.000184332	0.00275321	0.00191886	11335/5111/10951/4172/9878/4174/4175/4171/8658/6672/4683/983/5000/7013/2067/2237/4999/1642/7520/142/5591/4176/55651/8563/23468/545/328/4173/25777/23028/8363/79618/51548	33
GO:0019867	outer membrane	48/2643	203/18698	0.000184551	0.00275321	0.00191886	572/9804/3710/4830/11331/2181/1717/1727/2180/22877/10059/4891/10058/9823/10651/1374/596/4129/8936/5366/4128/6622/8564/1386/597/598/1610/55669/518/1268/7419/599/8408/6663/4653/4580/26056/10128/7417/7416/23111/91137/91543/51566/8303/51024/55139/54996	48
GO:0035579	specific granule membrane	26/2643	91/18698	0.000256788	0.00375423	0.00261653	5337/9761/10970/2040/3685/6616/102/22918/8514/963/7133/11322/945/634/9522/8560/353189/2204/932/2358/961/23352/138050/3163/28956/222487	26
GO:0001726	ruffle	40/2643	164/18698	0.000310979	0.00445274	0.00310335	1072/6282/2934/8826/378/9368/6624/4830/5420/302/5756/6249/23647/1785/3685/5141/10630/1915/5868/8394/7430/87/5879/6188/3936/23191/9026/5058/2191/23526/6093/23286/57608/8844/6277/59338/11275/79574/55785/81930	40
GO:0030663	COPI-coated vesicle membrane	9/2643	18/18698	0.000321859	0.00445274	0.00310335	10959/9276/372/11316/1315/1314/23423/22818/22820	9
GO:0031012	extracellular matrix	95/2643	479/18698	0.000324106	0.00445274	0.00310335	8404/3068/3959/811/7052/5654/5315/633/7045/302/2192/2202/1634/7450/4256/1277/5118/1739/9806/649/2817/4017/7058/7077/3898/1289/348/4237/1000/6280/4016/2199/5549/4015/1301/2152/1462/7033/2239/3908/283/6649/1605/259/22915/1359/1511/176/3848/5649/1300/7474/3827/5199/2254/1833/7482/30008/7143/64499/10085/2734/1805/6585/5764/54361/3958/1397/80781/1292/2719/9126/5919/7059/655/54674/3911/4653/652/1291/12…	95
GO:0070821	tertiary granule membrane	22/2643	73/18698	0.00032893	0.00445274	0.00310335	5337/8655/527/2040/1315/10159/6616/102/4893/22918/8514/963/11322/945/634/2204/6556/2358/961/23352/138050/28956	22
GO:0030175	filopodium	27/2643	98/18698	0.000376547	0.00500466	0.00348802	351/9368/3675/6624/5420/2195/5756/3093/3685/10788/2332/88/1525/55/10630/1605/9750/7430/3936/23191/10006/26031/1778/26230/84168/57698/25960	27
GO:0030126	COPI vesicle coat	8/2643	15/18698	0.000400242	0.00513517	0.00357898	9276/372/11316/1315/1314/23423/22818/22820	8
GO:0044391	ribosomal subunit	45/2643	193/18698	0.000400417	0.00513517	0.00357898	11224/6141/6193/6143/6133/6194/6204/6129/6176/6209/6159/6181/6132/6175/6222/740/6223/63931/1981/6188/6146/11222/7818/55651/116832/6157/6205/6165/6150/28977/51065/29088/51021/28998/28985/79590/51650/51121/51318/51373/65003/51023/51154/64960/63875	45
GO:0044445	cytosolic part	56/2643	255/18698	0.000437256	0.00551094	0.00384087	11224/6141/6193/6143/6133/6194/6204/6129/6176/10574/6209/6159/5708/10694/10575/6181/6132/6175/6222/5701/2023/5704/7917/908/6240/1727/6241/10576/6616/8772/6223/2983/842/11234/3045/1981/6188/22948/6146/55651/3043/116832/6157/23673/10213/23325/6205/6165/51065/28985/79443/51121/54785/51023/51154/29108	56
GO:0101003	ficolin-1-rich granule membrane	19/2643	61/18698	0.000519518	0.00623951	0.00434866	1832/8655/527/1315/10159/5547/22918/2357/1378/2204/5879/3958/6556/84658/2358/23352/23114/51143/79930	19
GO:0005791	rough endoplasmic reticulum	25/2643	90/18698	0.000533499	0.00623951	0.00434866	6141/821/351/4924/2752/5351/6734/7317/10970/6184/6726/23471/5352/51430/6622/3759/6780/3060/5024/6185/4653/23204/2044/29927/51009	25
GO:0034708	methyltransferase complex	26/2643	95/18698	0.000535409	0.00623951	0.00434866	2079/6633/6879/5931/10856/26121/6635/2146/9757/6636/1876/7403/6637/7404/81887/6628/1207/9070/8726/23468/5928/57680/4591/23135/84148/10419	26
GO:0005681	spliceosomal complex	44/2643	190/18698	0.000538135	0.00623951	0.00434866	10594/3550/3190/10992/6633/22913/3185/1665/6009/10212/103/8899/22889/26121/55308/25804/23658/27339/6635/1659/51747/6636/11157/3181/6637/4904/10236/6628/3958/988/9128/58517/140890/23398/55660/26094/26986/51729/51428/55696/79622/55110/55285/55015	44
GO:0034399	nuclear periphery	33/2643	131/18698	0.000545101	0.00623951	0.00434866	1072/7528/4841/5885/4926/468/1460/10856/25932/11331/7175/7157/9972/790/4152/4137/240/3181/1605/862/6002/1063/3842/9360/3856/9126/3843/11260/55660/64395/57122/8089/26502	33
GO:0031253	cell projection membrane	69/2643	332/18698	0.000546277	0.00623951	0.00434866	4735/1072/3326/2782/468/10552/378/9368/3675/6624/4830/5420/5756/1785/3685/1739/4891/6337/4137/2039/3775/8910/5141/10630/1915/6584/1212/768/286/4036/6094/5745/1800/79867/8787/634/9750/10672/8394/358/10109/4988/3749/5794/2821/6506/7430/5879/6188/3936/9026/5058/2890/2191/2121/4642/585/23526/23286/57608/8844/79901/30845/59338/79574/84168/81693/50807/50832	69
GO:0030427	site of polarized growth	38/2643	159/18698	0.000660195	0.00742466	0.00517465	351/8826/8239/1809/3675/6624/3799/66008/1785/1861/10409/6616/1627/7077/9638/2332/1525/4137/6622/283/57447/1268/2916/81565/10236/23191/10006/7531/8829/10092/26053/81544/79784/51393/26230/55118/81551/57698	38
GO:0030426	growth cone	37/2643	154/18698	0.000694067	0.00768732	0.00535771	351/8826/8239/1809/3675/6624/3799/66008/1785/1861/10409/6616/1627/7077/9638/2332/1525/4137/6622/283/57447/1268/81565/10236/23191/10006/7531/8829/10092/26053/81544/79784/51393/26230/55118/81551/57698	37
GO:0009898	cytoplasmic side of plasma membrane	41/2643	176/18698	0.000720081	0.0078564	0.00547555	9516/2782/2778/8826/2771/999/52/3716/25/2539/1445/5997/5605/6616/1739/9267/5996/27429/8514/2791/5778/3815/2786/2769/7189/914/27/8787/10672/4923/5747/7430/488/2534/9628/3702/7535/6277/408/55359/29127	41
GO:0098562	cytoplasmic side of membrane	45/2643	199/18698	0.000801896	0.00862038	0.00600801	9516/2782/2778/8826/2771/999/52/3716/25/2539/1445/5997/5605/6616/1739/9267/5996/27429/8514/2791/5778/1915/3815/2786/2769/7189/914/5868/27/8787/10672/4923/5747/7430/488/2534/9628/3702/7535/6277/29965/408/55359/63892/29127	45
GO:0005832	chaperonin-containing T-complex	7/2643	13/18698	0.000876074	0.00916656	0.00638867	10574/10694/10575/908/10576/22948/79443	7
GO:0005903	brush border	26/2643	98/18698	0.000891855	0.00916656	0.00638867	3326/10096/3710/9368/4643/10059/4891/3775/2028/6584/4036/5745/10672/6564/10755/358/5651/7430/87/4637/4642/4648/79784/79901/54407/81693	26
GO:0010494	cytoplasmic stress granule	15/2643	45/18698	0.000898311	0.00916656	0.00638867	4076/9698/1653/7072/10146/11273/2332/1511/6780/10084/4904/8444/23367/149041/26986	15
GO:0072686	mitotic spindle	25/2643	93/18698	0.000902862	0.00916656	0.00638867	3550/8655/4926/7175/8658/10615/983/4085/2801/3832/8556/11104/6188/9126/10474/51203/10460/1894/114327/259266/55755/55689/81930/146909/29127	25
GO:0014704	intercalated disc	16/2643	50/18698	0.00101273	0.0101412	0.00706794	1832/6513/1739/287/1000/4620/10791/9472/5348/3759/5318/87/6548/5058/23363/1829	16
GO:0016607	nuclear speck	76/2643	381/18698	0.00102998	0.0101745	0.00709116	10594/4841/3550/9733/10992/2034/10970/9698/11176/1665/10212/10051/6429/11273/9158/8899/10409/26121/7994/1432/9425/27339/1196/4152/6430/6239/7764/51747/4137/10772/3984/8405/580/3212/4488/4776/6431/627/8394/11170/6915/10084/9584/4208/661/2122/6046/10284/8241/9360/988/9128/8930/79068/26235/328/5275/58517/23360/140890/91647/10346/55660/55589/123872/11221/9404/55914/4338/29883/80764/56731/84656/79960/…	76
GO:0005798	Golgi-associated vesicle	40/2643	174/18698	0.00108916	0.0106157	0.00739863	10959/351/4924/22872/9276/372/6721/11316/1315/56681/567/9871/10897/102/3998/164/10016/11018/10484/2801/7039/1212/8120/2157/54732/6517/6396/1314/23423/2890/51124/83988/23390/3105/3120/23256/22818/22820/553115/90522	40
GO:0036464	cytoplasmic ribonucleoprotein granule	43/2643	191/18698	0.00113534	0.0109202	0.00761087	6194/4076/8826/10970/6175/5701/9698/1653/7072/8878/10146/8087/11273/25804/9475/1025/5685/26019/2332/4137/9118/6461/11157/580/6637/1511/6780/10084/4904/5879/23741/203068/8444/85363/23367/149041/26986/4848/29883/28960/8994/192670/11022	43
GO:0098794	postsynapse	87/2643	450/18698	0.00127492	0.0119791	0.00834889	821/351/5701/378/55752/22883/8087/2030/25/27020/1785/26037/6812/613/6616/1739/102/9101/287/10059/8898/10611/8440/8514/9743/1000/2332/88/4137/2149/1902/57030/9746/6622/2039/3908/1212/286/9201/1605/8997/5868/4983/2569/8943/3759/2045/9127/4915/207/2911/4923/10755/8973/3060/5747/4208/4988/10505/5024/2893/5879/23191/10006/23208/9026/27065/2890/2534/1136/2904/4131/10486/201191/1131/2901/9419/408/79870/…	87
GO:0030134	COPII-coated ER to Golgi transport vesicle	24/2643	90/18698	0.00127821	0.0119791	0.00834889	10959/351/22872/6721/56681/567/9871/10897/3998/10016/11018/10484/2801/7039/2157/54732/6396/23423/2890/51124/3105/3120/553115/90522	24
GO:0030137	COPI-coated vesicle	10/2643	25/18698	0.00133908	0.0123907	0.00863576	10959/9276/372/11316/1315/8120/1314/23423/22818/22820	10
GO:0005884	actin filament	26/2643	101/18698	0.00143859	0.0131451	0.00916156	8826/301/5358/1809/6624/5756/9817/10788/25802/88/5074/7169/2039/395/7010/7430/87/5879/3936/7171/5058/2534/23384/7114/9168/55604	26
GO:0043195	terminal bouton	20/2643	71/18698	0.001533	0.0132874	0.00926071	351/6812/790/10497/9145/6622/5217/794/10874/5868/116/4983/8943/4915/4923/5024/23191/23208/10228/2901	20
GO:0030127	COPII vesicle coat	7/2643	14/18698	0.00153895	0.0132874	0.00926071	22872/56681/9871/10016/10484/6396/553115	7
GO:0101031	chaperone complex	7/2643	14/18698	0.00153895	0.0132874	0.00926071	10574/10694/10575/908/10576/22948/79443	7
GO:0005766	primary lysosome	36/2643	155/18698	0.00155183	0.0132874	0.00926071	9798/10694/527/6386/10970/2040/5547/302/1727/3074/10576/8895/8836/4126/3614/9145/55/4332/2357/1511/6036/2588/1669/353189/1650/5036/23385/10383/203068/6813/7276/1778/23317/23526/51316/29108	36
GO:0042582	azurophil granule	36/2643	155/18698	0.00155183	0.0132874	0.00926071	9798/10694/527/6386/10970/2040/5547/302/1727/3074/10576/8895/8836/4126/3614/9145/55/4332/2357/1511/6036/2588/1669/353189/1650/5036/23385/10383/203068/6813/7276/1778/23317/23526/51316/29108	36
GO:0005759	mitochondrial matrix	87/2643	453/18698	0.00156322	0.0132874	0.00926071	3735/3313/2876/3329/506/6464/740/7157/6059/23568/79586/3028/35/1666/402/7298/6742/8192/2744/983/7915/4350/8659/63931/1716/384/4329/22907/78988/27292/5303/3029/3336/38/2395/33/5165/598/2066/763/1757/6188/2617/11222/7818/708/9361/4191/7263/219/1632/10587/1737/10128/7417/7416/4833/6150/6472/891/1743/54516/373156/4705/55699/28977/29088/51021/28998/79590/29960/53343/51650/51110/23417/51318/51373/79736…	87
GO:0035770	ribonucleoprotein granule	44/2643	200/18698	0.00163162	0.0137094	0.00955481	6194/4076/8826/10970/6175/5701/9698/1653/7072/8878/10146/8087/11273/25804/9475/1025/5685/26019/2332/4137/22907/9118/6461/11157/580/6637/1511/6780/10084/4904/5879/23741/203068/8444/85363/23367/149041/26986/4848/29883/28960/8994/192670/11022	44
GO:0046930	pore complex	8/2643	18/18698	0.00183318	0.0152279	0.0106132	730/596/727/732/7419/947/7417/7416	8
GO:0005839	proteasome core complex	9/2643	22/18698	0.00193252	0.0153578	0.0107037	5695/9491/5691/5682/5692/5685/5698/5694/5696	9
GO:0019774	proteasome core complex, beta-subunit complex	6/2643	11/18698	0.00193285	0.0153578	0.0107037	5695/5691/5692/5698/5694/5696	6
GO:0031094	platelet dense tubular network	6/2643	11/18698	0.00193285	0.0153578	0.0107037	3710/3709/2149/2039/489/488	6
GO:0042555	MCM complex	6/2643	11/18698	0.00193285	0.0153578	0.0107037	4172/4174/4175/4171/4176/4173	6
GO:0010008	endosome membrane	86/2643	451/18698	0.00205035	0.0161162	0.0112322	5337/163/1173/9528/9741/9516/527/7317/9784/301/3654/302/1182/1889/567/27243/10226/9101/4891/10058/8898/9743/11230/6653/8027/22876/3109/9727/4360/10040/65082/9482/4689/9744/8723/7189/912/5868/7855/154/8943/9522/7781/4915/6532/6683/55353/2923/5879/23062/30844/27065/2890/6490/29984/6556/9146/26056/23673/25777/23339/10410/23317/3105/5911/3120/26088/80762/53373/29965/55198/28956/11267/55240/51293/5466…	86
GO:0043197	dendritic spine	35/2643	153/18698	0.00234731	0.0182541	0.0127223	821/351/5701/378/55752/8087/1785/26037/9101/8898/9743/2332/88/4137/1902/3908/4983/3759/4915/4923/10755/5747/5024/2893/5879/23191/23208/9026/2890/4131/9419/408/11178/26232/50807	35
GO:0030027	lamellipodium	41/2643	187/18698	0.00245773	0.0187519	0.0130692	1072/351/2934/10096/999/1809/6624/5420/2195/1785/3685/5797/1000/10788/8936/8470/3984/10630/1605/22885/8394/5747/10109/5879/23191/10006/6548/9459/5058/2191/10092/6093/348110/9578/11275/55604/55785/26230/84168/23603/57698	41
GO:0000781	chromosome, telomeric region	36/2643	159/18698	0.00247252	0.0187519	0.0130692	11335/10728/5111/10951/4172/9878/4174/4175/4171/8658/6672/4683/983/5000/7013/2067/2237/4999/3181/1111/1642/7520/142/5591/4176/55651/8563/23468/545/328/4173/25777/23028/8363/79618/51548	36
GO:0031234	extrinsic component of cytoplasmic side of plasma membrane	27/2643	110/18698	0.00248828	0.0187519	0.0130692	2782/2778/8826/2771/3716/25/1445/6616/9267/5996/8514/2791/2786/2769/27/8787/10672/5747/488/2534/9628/3702/7535/6277/408/55359/29127	27
GO:0005689	U12-type spliceosomal complex	10/2643	27/18698	0.00264387	0.0197211	0.0137447	10992/6633/1665/6635/6636/6637/4904/6628/79622/55285	10
GO:0005769	early endosome	66/2643	334/18698	0.0026864	0.019836	0.0138248	4924/5245/9516/3329/9784/301/302/1182/567/66008/5605/9101/287/6477/4891/8898/348/6653/8027/920/22876/2149/65082/9482/8639/10612/8723/1730/5868/7855/154/4915/5861/55353/2532/913/8073/23062/9100/6478/30844/27065/2890/29984/9146/8829/5987/26056/5595/23673/81614/9777/23317/23180/9711/23325/10228/3105/26088/55198/51009/79874/54809/50489/29058/89853	66
GO:0031528	microvillus membrane	9/2643	23/18698	0.00278065	0.0203266	0.0141667	9368/5420/3685/10630/768/1800/634/5794/7430	9
GO:0032587	ruffle membrane	23/2643	90/18698	0.00290617	0.0210338	0.0146596	1072/378/4830/5756/1785/3685/5141/10630/1915/8394/7430/5879/6188/3936/9026/5058/2191/23526/23286/57608/8844/59338/79574	23
GO:0044309	neuron spine	35/2643	155/18698	0.00294877	0.0211329	0.0147287	821/351/5701/378/55752/8087/1785/26037/9101/8898/9743/2332/88/4137/1902/3908/4983/3759/4915/4923/10755/5747/5024/2893/5879/23191/23208/9026/2890/4131/9419/408/11178/26232/50807	35
GO:0000152	nuclear ubiquitin ligase complex	13/2643	41/18698	0.00321173	0.0227939	0.0158863	51433/27338/991/11065/9820/701/25906/580/6047/23492/79184/1911/29882	13
GO:0005793	endoplasmic reticulum-Golgi intermediate compartment	29/2643	123/18698	0.00334139	0.023043	0.0160599	10959/4924/5034/3146/9798/811/1315/11079/6890/10897/10282/3998/11018/2801/7039/2157/54732/10130/871/4121/5862/6892/23423/2890/3309/51614/53345/22820/90522	29
GO:0022626	cytosolic ribosome	29/2643	123/18698	0.00334139	0.023043	0.0160599	11224/6141/6193/6143/6133/6194/6204/6129/6176/6209/6159/6181/6132/6175/6222/6223/1981/6188/6146/55651/116832/6157/6205/6165/51065/28985/51121/51023/51154	29
GO:0043679	axon terminus	29/2643	123/18698	0.00334139	0.023043	0.0160599	351/2752/6812/790/10497/8514/2332/9145/6622/5217/794/4919/10874/5868/116/4983/8943/4915/4923/3749/5024/10236/23191/23208/1006/10228/1131/2901/1129	29
GO:0044440	endosomal part	92/2643	496/18698	0.00340478	0.023048	0.0160634	5337/351/163/1173/9528/9741/9516/1508/527/7317/9784/301/3654/302/1182/1889/567/51622/27243/10226/9101/4891/10058/8898/9743/11230/6653/8027/22876/3109/9727/4360/10040/65082/9482/4689/9744/8723/7189/4036/912/5868/7855/154/5618/8943/9522/7781/4915/6532/6683/55353/2923/5879/23062/30844/27065/2890/6490/29984/6556/9146/26056/23673/25777/23339/10410/23317/3105/5911/3120/26088/80762/53373/29965/55198/289…	92
GO:0005687	U4 snRNP	6/2643	12/18698	0.00340518	0.023048	0.0160634	6633/26121/6635/6636/6637/6628	6
GO:0120114	Sm-like protein family complex	21/2643	81/18698	0.0035991	0.0241371	0.0168225	10594/9733/10992/6633/11171/26121/25804/23658/6635/51747/6636/11157/6637/6628/1207/9128/55660/26094/96764/79833/55015	21
GO:0030660	Golgi-associated vesicle membrane	27/2643	113/18698	0.00372398	0.0247476	0.0172479	10959/22872/9276/372/6721/11316/1315/56681/567/9871/3998/164/10016/10484/7039/1212/6396/1314/23423/2890/83988/23390/3105/3120/22818/22820/553115	27
GO:0098858	actin-based cell projection	42/2643	197/18698	0.00376756	0.0248116	0.0172925	351/389/9368/3675/25932/6624/5420/2195/5756/523/3093/3685/23303/10788/2332/88/1525/55/3384/10630/8639/768/1605/284/1800/634/7010/9750/5794/7430/3936/23191/10006/26031/1778/23114/4648/26230/84168/51168/57698/25960	42
GO:0005667	transcription factor complex	67/2643	345/18698	0.00386038	0.0251064	0.017498	7528/6881/4841/468/2034/10155/6879/3182/6659/7157/5970/1019/2975/6256/4089/8295/2958/5089/1869/1487/1871/2067/6925/10062/1876/4211/5090/7027/4005/7004/5087/4862/4776/6886/4093/9079/4656/2649/3516/2624/4772/4205/2494/5468/142/5591/6774/6873/10481/2627/328/51176/10474/1022/23028/10498/6934/10923/84864/10629/10413/860/4801/11267/79101/8994/9440	67
GO:0022624	proteasome accessory complex	9/2643	24/18698	0.0038977	0.0251064	0.017498	5720/5708/5710/10197/5701/5704/5718/5711/10213	9
GO:0005604	basement membrane	23/2643	92/18698	0.00391537	0.0251064	0.017498	7045/302/2192/1739/4017/7058/3898/1289/4016/3908/283/1605/2254/30008/5764/80781/9126/3911/1287/55914/55214/79812/9510	23
GO:0005790	smooth endoplasmic reticulum	11/2643	33/18698	0.00425007	0.0270157	0.0188287	821/351/11337/10525/811/5479/3283/6263/3759/3309/4642	11
GO:0005876	spindle microtubule	16/2643	57/18698	0.00452604	0.0285218	0.0198784	4926/7283/6907/403/827/10615/983/10426/3832/9735/6795/11127/9055/51203/81930/146909	16
GO:0019898	extrinsic component of membrane	57/2643	289/18698	0.00521494	0.0320348	0.0223268	4924/2782/4926/2778/8826/6281/301/2771/999/302/3716/7175/2802/25/1445/1861/6616/5652/9101/9267/5996/1001/8514/1000/2332/5293/2791/10484/1003/2786/2219/8723/2769/1004/27/8787/28513/10672/5296/1009/5747/7430/488/8408/6663/2534/9628/1006/3702/55187/7535/6277/408/55359/94025/64066/29127	57
GO:0015935	small ribosomal subunit	19/2643	73/18698	0.00521498	0.0320348	0.0223268	6193/6194/6204/6209/6222/6223/63931/1981/6188/7818/6205/28977/51065/51021/28985/51650/51373/51023/64960	19
GO:0035097	histone methyltransferase complex	19/2643	73/18698	0.00521498	0.0320348	0.0223268	6879/5931/10856/26121/2146/9757/1876/7403/7404/81887/9070/8726/23468/5928/57680/4591/23135/84148/10419	19
GO:0005775	vacuolar lumen	37/2643	172/18698	0.00537773	0.0327179	0.0228029	1200/1508/9798/10694/6386/633/302/1727/1634/3074/10576/2817/8836/4126/6948/3614/5549/6448/1462/4332/2239/1511/176/6036/2588/913/5036/10383/203068/2719/27065/7276/5275/1778/23526/51316/29108	37
GO:0097525	spliceosomal snRNP complex	17/2643	63/18698	0.00541569	0.0327179	0.0228029	10594/9733/10992/6633/26121/25804/23658/6635/51747/6636/11157/6637/6628/9128/55660/26094/55015	17
GO:0000153	cytoplasmic ubiquitin ligase complex	6/2643	13/18698	0.00557299	0.0333923	0.0232729	6923/10956/6400/7428/64422/550	6
GO:0030133	transport vesicle	72/2643	381/18698	0.00562253	0.0334152	0.0232889	10959/11014/22872/9276/372/6721/633/11316/1315/1809/56681/10987/1182/567/10226/1861/9871/1176/6616/10282/10497/10059/8898/3998/164/10016/11015/57030/9145/10484/6622/2264/5126/7039/1212/51760/1359/54732/5868/627/634/6517/598/9522/7781/8674/10755/3060/6396/5861/81565/1314/23423/23208/2890/90865/6833/26056/9001/7417/83988/7416/10228/3105/534/3120/25844/22818/22820/553115/29058/9367	72
GO:0005680	anaphase-promoting complex	8/2643	21/18698	0.00575787	0.033672	0.0234679	51433/27338/991/11065/9820/701/25906/29882	8
GO:0005685	U1 snRNP	8/2643	21/18698	0.00575787	0.033672	0.0234679	6633/6635/51747/6636/6637/6628/55660/55015	8
GO:0044306	neuron projection terminus	31/2643	139/18698	0.00596942	0.0346321	0.024137	351/2752/7345/6812/790/10497/8514/2332/9145/6622/5217/794/11341/4919/10874/5868/116/4983/8943/4915/4923/3749/5024/10236/23191/23208/1006/10228/1131/2901/1129	31
GO:0000779	condensed chromosome, centromeric region	27/2643	117/18698	0.00614245	0.0353553	0.0246411	4735/11335/7756/9184/332/10615/9770/4085/701/10403/11258/4999/9735/1063/81565/6795/23310/891/147841/51143/55055/9985/64151/55355/79019/57122/79682	27
GO:0031091	platelet alpha granule	22/2643	90/18698	0.00626501	0.035767	0.0249279	351/226/51097/7450/6812/7058/88/6622/1675/22915/2157/6403/3827/3273/5196/87/5175/7114/2/29789/2266/54863	22
GO:0097526	spliceosomal tri-snRNP complex	10/2643	30/18698	0.00631182	0.035767	0.0249279	10594/6633/26121/25804/23658/6635/11157/6637/6628/9128	10
GO:0030532	small nuclear ribonucleoprotein complex	18/2643	70/18698	0.00736688	0.0414245	0.028871	10594/9733/10992/6633/26121/25804/23658/6635/51747/6636/11157/6637/6628/9128/55660/26094/96764/55015	18
GO:0016324	apical plasma membrane	58/2643	300/18698	0.00748283	0.0417553	0.0291015	5337/3326/2778/301/6513/9368/5420/2030/10327/523/6522/1739/3485/287/51421/4891/1000/6337/8323/8470/6558/5144/3775/4118/2028/10630/5002/6584/5348/6338/4036/5745/9365/1800/154/6505/634/7010/9750/5593/358/5747/5794/6559/3753/7430/182/6813/6548/947/9026/5584/7348/92140/1829/4851/259266/81693	58
GO:0031970	organelle envelope lumen	21/2643	86/18698	0.0075509	0.041816	0.0291438	351/27101/1340/23568/402/27429/6653/1371/240/3283/54205/203068/26235/4653/4833/6472/51142/64083/51012/79145/65260	21
GO:0030123	AP-3 adaptor complex	5/2643	10/18698	0.00762176	0.041891	0.0291962	1176/65082/8120/8943/23339	5
GO:0005684	U2-type spliceosomal complex	16/2643	60/18698	0.00774165	0.0420791	0.0293272	10594/10992/6633/1665/26121/27339/6635/1659/51747/6636/6637/6628/988/55660/55696/55015	16
GO:0044420	extracellular matrix component	27/2643	119/18698	0.00777167	0.0420791	0.0293272	7045/302/2192/1277/1739/4017/7058/3898/1289/4237/4016/1301/3908/283/1605/2254/30008/7143/5764/80781/9126/3911/1287/55914/55214/79812/9510	27
GO:0000922	spindle pole	33/2643	153/18698	0.00789753	0.0420791	0.0293272	4869/3550/4926/7283/1432/8658/11073/991/10615/4085/10426/2801/3832/8556/11104/9735/1063/9126/6795/140609/23331/891/123872/79184/51143/9055/51164/26586/10460/55112/114327/259266/55755	33
GO:0000793	condensed chromosome	44/2643	217/18698	0.00792408	0.0420791	0.0293272	4735/11335/5885/3146/7756/7153/9184/10051/7283/332/11073/10615/9770/4085/701/10609/10403/10592/11258/4999/1111/6002/9735/10388/1063/81565/7273/3148/9126/6795/10128/25777/23310/891/642636/147841/51143/55055/9985/64151/55355/79019/57122/79682	44
GO:0005868	cytoplasmic dynein complex	8/2643	22/18698	0.00794379	0.0420791	0.0293272	8655/7175/8723/1781/1778/51143/51164/55112	8
GO:0005875	microtubule associated complex	32/2643	148/18698	0.00848207	0.0441894	0.030798	11337/8655/7175/3799/332/10048/23303/3800/4137/23637/11258/3832/8723/6780/81565/7531/6795/1781/1778/4131/11127/55567/1768/51143/51164/55201/10112/55112/55083/81930/57698/146909	32
GO:0030176	integral component of endoplasmic reticulum membrane	32/2643	148/18698	0.00848207	0.0441894	0.030798	821/811/6238/6721/1717/11231/6890/54788/7466/23770/9524/8879/54499/6892/23204/3309/23141/3105/55831/3120/29927/51604/51495/51283/10328/51009/54872/9451/51016/9200/550/92579	32
GO:0034719	SMN-Sm protein complex	7/2643	18/18698	0.00852353	0.0441894	0.030798	6633/11171/6635/6636/6637/6628/79833	7
GO:0030139	endocytic vesicle	56/2643	290/18698	0.00867518	0.0446589	0.0311252	5337/163/1173/2934/10525/811/527/1182/567/3799/1785/6812/6890/3685/10497/4643/348/22876/9727/1902/9482/9140/4689/1212/4920/4036/7474/5868/7855/10808/10755/2893/54361/2923/6892/3043/23208/6813/306/9026/2890/7096/2535/6556/23673/10228/57214/3105/5898/3120/7184/30845/57192/50489/81693/9367	56
GO:0005811	lipid droplet	19/2643	77/18698	0.0095523	0.0488303	0.0340325	10970/3654/302/2181/51097/1727/10226/27339/5947/7189/6683/25840/123/6418/23111/2597/50486/91543/51170	19
GO:0015934	large ribosomal subunit	27/2643	121/18698	0.0097407	0.0494476	0.0344627	11224/6141/6143/6133/6129/6176/6159/6181/6132/6175/740/6146/11222/55651/116832/6157/6165/6150/28977/29088/28998/79590/51121/51318/65003/51154/63875	27
