# Supplementary material for: Development and Validation of a Prognostic Signature for Malignant Pleural Mesothelioma
Source: Front Oncol. 2019 Feb 15;9:78. doi: 10.3389/fonc.2019.00078 (PMC6384238; doi:10.3389/fonc.2019.00078)
Supplement: Table S4 — KEGG enrichment results. [file Table_4.XLS]

## Sheet: oscc_KEGG-enrich_gsea
ID	Description	setSize	enrichmentScore	NES	pvalue	p.adjust	qvalues	rank	leading_edge	core_enrichment
hsa03030	DNA replication	35	0.715088	2.1428	0.00211416	0.0231753	0.0165538	2900	tags=64%, list=19%, signal=52%	5984/4171/2237/10535/5558/1763/5427/4173/4174/4176/5424/23649/5111/6119/4175/5983/5557/5985/4172/5426/3978/56655/5982
hsa00532	Glycosaminoglycan biosynthesis - chondroitin sulfate / dermatan sulfate	19	0.704021	1.83585	0.002079	0.0231753	0.0165538	2716	tags=73%, list=18%, signal=60%	50515/337876/56548/51363/55454/79586/26229/54480/64132/29940/29940/29940/9469/55501/126792/113189
hsa04512	ECM-receptor interaction	61	0.699492	2.36965	0.00209644	0.0231753	0.0165538	846	tags=40%, list=6%, signal=38%	1277/3918/2335/6696/1282/284217/1278/1293/1284/1288/3909/3678/1291/22801/3371/1287/1292/7058/3914/3655/3675/375790/3672/3161/3912/3910/3691
hsa05320	Autoimmune thyroid disease	25	0.668764	1.8595	0.00212766	0.0231753	0.0165538	1949	tags=33%, list=13%, signal=29%	1493/3134/3134/3134/3134/3134/3134/3134/3106/3106/3106/3106/3106/3106/3002/3105/3105/3105/3105/3105/3105/3105/3105/3135/3135/3135/3135/3135/3135/3135/3135/3107/3107/3107/3107/3107/3107/3107/942/3112/3112/3112/3112/3112/3112/5551
hsa04974	Protein digestion and absorption	55	0.628014	2.07968	0.00212314	0.0231753	0.0165538	381	tags=37%, list=3%, signal=36%	1300/1301/1277/1289/1290/169044/1281/1303/1282/1278/1293/1284/1305/1294/1288/85301/1291/50509/1287/1292/255631
hsa05332	Graft-versus-host disease	28	0.623909	1.80358	0.00429185	0.028582	0.0204157	1949	tags=32%, list=13%, signal=28%	3552/3134/3134/3134/3134/3134/3134/3134/3106/3106/3106/3106/3106/3106/3002/3105/3105/3105/3105/3105/3105/3105/3105/3135/3135/3135/3135/3135/3135/3135/3135/3107/3107/3107/3107/3107/3107/3107/3553/942/3112/3112/3112/3112/3112/3112/5551
hsa04110	Cell cycle	120	0.606776	2.29935	0.00208333	0.0231753	0.0165538	2424	tags=40%, list=16%, signal=33%	9088/8900/8318/5347/991/23594/995/1869/994/7040/990/9133/699/4998/898/701/4171/890/7272/983/1029/891/9232/7043/4085/1111/4173/9134/4174/1021/2810/4176/10459/6502/8317/5111/10926/4175/1017/993/5933/11200/1871/4172/8379/7533/5591/5885/9184
hsa03050	Proteasome	42	0.574427	1.79098	0.00430108	0.028582	0.0204157	4272	tags=75%, list=28%, signal=54%	5698/5698/5698/5698/5698/5698/5698/5698/5708/5690/5696/5696/5696/5696/5696/5696/5696/5696/5721/5721/7979/5691/5691/5695/5685/5688/5687/5689/5689/5692/5719/5717/5682/11047/10213/5684/5709/5686/5683/5710/5702/5701/5693/5699/5704/5704
hsa05322	Systemic lupus erythematosus	58	0.565027	1.88301	0.004329	0.028582	0.0204157	2981	tags=29%, list=20%, signal=24%	8357/8969/2214/717/717/717/717/717/717/717/8294/3012/3017/85236/2212/8970/8365/87/716/8339/942/8347/3112/3112/3112/3112/3112/3112/6628/6737/3014/2209/713/715/714/3015/712/7124/7124/7124/7124/7124/7124/7124/7124/6632
hsa03440	Homologous recombination	38	0.561501	1.7144	0.0041841	0.028582	0.0204157	2277	tags=38%, list=15%, signal=32%	146956/7516/8438/5888/5888/25788/25788/7517/675/83990/641/672/5424/6119/7979/11073
hsa03460	Fanconi anemia pathway	47	0.548355	1.75411	0.00424628	0.028582	0.0204157	1882	tags=34%, list=12%, signal=30%	146956/5888/5888/2187/116028/2175/29089/55215/91442/675/83990/641/672/2189/6119/2178/2176
hsa05222	Small cell lung cancer	86	0.539998	1.94308	0.004329	0.028582	0.0204157	2398	tags=36%, list=16%, signal=30%	3918/2335/1282/284217/1284/1288/3909/1287/3914/3655/1869/3675/898/3912/1164/1163/3910/5293/9134/3915/1021/5743/6502/578/3685/7185/1017/5747/3911/581/10000/10000/1871/7186
hsa05146	Amoebiasis	75	0.52095	1.81644	0.00445434	0.028582	0.0204157	1342	tags=25%, list=9%, signal=23%	1277/3918/1281/2335/1282/284217/1278/1284/1288/3909/1287/3914/7040/3576/3912/3910/5293/7043/3553/3915/87
hsa04933	AGE-RAGE signaling pathway in diabetic complications	95	0.477132	1.73856	0.00430108	0.028582	0.0204157	2961	tags=41%, list=20%, signal=34%	1277/5054/1281/2335/1282/1278/1284/1288/3552/50507/1287/7040/7424/4313/3576/6772/5293/7043/3383/3553/6300/7422/5335/581/7046/5600/10000/10000/177/177/177/177/177/177/177/5331/1019/1536/7124/7124/7124/7124/7124/7124/7124/7124
hsa04510	Focal adhesion	172	0.476771	1.88947	0.0021692	0.0231753	0.0165538	1826	tags=25%, list=12%, signal=22%	1277/3918/2335/6696/1282/284217/1278/1293/1284/1288/3909/3678/1291/22801/3371/1287/1292/5228/7058/3914/857/3655/7410/3675/5159/7424/3672/5880/3912/3910/3691/5293/4233/5829/5154/2316/3915/87/3694/5155/3685/858/1298/5881/6464/7422
hsa05323	Rheumatoid arthritis	77	0.470688	1.65862	0.004329	0.028582	0.0204157	2107	tags=24%, list=14%, signal=21%	4312/4314/3589/3552/1493/6374/7040/6364/3576/6352/6352/54/1513/1514/7043/3383/6348/6348/6348/3553/4050/4050/4050/4050/4050/4050/4050/4050/528/2919/942/10312/7422/3112/3112/3112/3112/3112/3112/51561/10673/7097
hsa04657	IL-17 signaling pathway	75	0.463497	1.61612	0.00445434	0.028582	0.0204157	2961	tags=39%, list=20%, signal=31%	4322/4312/4314/4318/3627/6374/6364/3576/6278/8772/3553/5743/6300/7128/8061/2921/2919/225689/225689/7184/1051/5600/7186/7188/841/7124/7124/7124/7124/7124/7124/7124/7124
hsa05162	Measles	105	0.454786	1.6717	0.00436681	0.028582	0.0204157	2196	tags=26%, list=15%, signal=23%	3552/4939/4940/3559/898/23586/6772/10379/10379/3665/3665/5293/4478/64135/5610/4599/6773/3553/9134/1021/868/4938/8743/7128/8795/27113/3718/1017/3661/103/3306/7097/10000/10000
hsa04115	p53 signaling pathway	68	0.453426	1.56509	0.00852878	0.0495635	0.0354025	3118	tags=37%, list=21%, signal=30%	5054/51512/9133/898/983/1029/891/6241/3486/1111/9134/6477/1021/2810/8795/27113/637/1017/581/11200/1019/841/10572/7161/92344/55367
hsa05206	MicroRNAs in cancer	142	0.449778	1.74641	0.0021322	0.0231753	0.0165538	1904	tags=22%, list=13%, signal=19%	8091/3236/4318/5328/3678/1789/6624/3371/113130/8651/995/1869/994/5159/4325/9493/898/1029/4233/5154/3925/9134/1021/5743/90427/5155/672/578/8626/54541/2744/6464/7422/1786/5335
hsa05165	Human papillomavirus infection	289	0.448189	1.88032	0.00219298	0.0231753	0.0165538	2385	tags=33%, list=16%, signal=28%	9636/1277/3918/7472/2335/6696/1282/284217/1278/8638/1293/1284/7476/1288/3909/3678/1291/2535/22801/3371/1287/1292/8900/7058/3914/3655/1869/3675/5159/26508/7477/3672/898/54626/890/3912/3134/3134/3134/3134/3134/3134/3134/6772/8772/10379/10379/3910/3691/5293/3106/3106/3106/3106/3106/3106/80326/5610/4599/6773/5829/3105/3105/3105/3105/3105/3105/3105/3105/3135/3135/3135/3135/3135/3135/3135/3135/57801/31…
hsa04926	Relaxin signaling pathway	110	0.443785	1.6551	0.00425532	0.028582	0.0204157	572	tags=12%, list=4%, signal=12%	4322/4312/4318/1277/2792/1281/1282/1278/1284/1288/1287/7040/7424/4313
hsa04218	Cellular senescence	147	0.389916	1.51957	0.00431965	0.028582	0.0204157	2331	tags=38%, list=15%, signal=32%	5054/3552/4605/8900/2305/1869/7040/9133/3576/898/890/3134/3134/3134/3134/3134/3134/3134/983/1029/891/5293/3106/3106/3106/3106/3106/3106/3486/7043/1111/3105/3105/3105/3105/3105/3105/3105/3105/3135/3135/3135/3135/3135/3135/3135/3135/3107/3107/3107/3107/3107/3107/3107/9134/1021/3710/2113/6300/22800/6237/1017/993/5933/11200/7046/5600/10000/10000/1871/1978/5883
hsa04060	Cytokine-cytokine receptor interaction	173	0.388641	1.54179	0.0021692	0.0231753	0.0165538	2199	tags=37%, list=15%, signal=32%	3624/3589/10563/6373/3627/11009/4283/56300/970/3552/7292/3604/6374/51330/7293/7040/3595/4803/6364/3576/3559/6352/6352/8784/3575/943/130399/50615/8718/5008/133396/7043/9235/84957/658/6348/6348/6348/8744/6362/6362/6362/650/3553/3577/3594/53833/26525/656/2057/8743/4050/4050/4050/4050/4050/4050/4050/4050/2921/57007/23529/8795/2919/9547/3601/9173/1441/90/51561/10673/7046/6351/6351/6351
hsa05203	Viral carcinogenesis	164	0.378552	1.48982	0.00215054	0.0231753	0.0165538	2820	tags=39%, list=19%, signal=32%	8900/991/898/890/3134/3134/3134/3134/3134/3134/3134/983/8294/1029/10379/10379/3665/3665/3017/85236/5293/3106/3106/3106/3106/3106/3106/8970/1111/5610/5829/3105/3105/3105/3105/3105/3105/3105/3105/8365/3135/3135/3135/3135/3135/3135/3135/3135/3107/3107/3107/3107/3107/3107/3107/9134/1021/87/8339/6502/578/5902/6672/7185/8347/3718/1017/3661/2648/5933/581/83933/8379/7533/7186/5315/2968/2968/2968/2968/296…
hsa04151	PI3K-Akt signaling pathway	271	0.375615	1.56714	0.00224215	0.0231753	0.0165538	2220	tags=23%, list=15%, signal=20%	1277/3918/2792/2335/6696/1282/284217/1278/1293/1284/1288/3909/3678/1291/22801/3371/1287/1292/5228/7058/3914/3655/285/3675/5159/7424/4803/3672/3559/898/3912/3575/3910/3691/2149/5293/5008/4233/5154/9134/3915/2264/1021/3694/5155/672/10681/23566/2057/54541/3685/5522/1298/374/3718/7422/1017/5747/7184/1441/3911/9170/7097/10000/10000/2321
hsa05205	Proteoglycans in cancer	178	0.355841	1.42505	0.00636943	0.0392357	0.0280255	2961	tags=33%, list=20%, signal=27%	3236/4318/7472/2335/5328/7476/3678/2535/4060/857/7040/5329/7410/7477/4313/5293/1514/4478/7291/80326/4233/5829/2316/3710/8323/6300/3685/117581/858/22800/7422/6237/5335/9138/5747/7097/5600/10000/10000/3091/7473/7473/7473/6382/2017/960/3480/2817/3688/1956/6714/6383/89780/3693/7482/7124/7124/7124/7124/7124/7124/7124/7124
hsa05166	HTLV-I infection	235	0.348978	1.43588	0.00215054	0.0231753	0.0165538	2961	tags=31%, list=20%, signal=26%	7472/7476/2535/4605/991/6513/1869/7040/5159/9133/7477/3559/701/3134/3134/3134/3134/3134/3134/3134/1029/9232/5293/3106/3106/3106/3106/3106/3106/7043/4085/80326/1111/3383/3105/3105/3105/3105/3105/3105/3105/3105/5154/5427/3135/3135/3135/3135/3135/3135/3135/3135/3107/3107/3107/3107/3107/3107/3107/4488/5155/8323/2113/5902/5424/4487/8061/6929/5111/22800/3601/3718/6237/3112/3112/3112/3112/3112/3112/2648…
hsa05200	Pathways in cancer	433	0.340214	1.47916	0.00225734	0.0231753	0.0165538	2946	tags=29%, list=19%, signal=24%	4312/4318/3918/7472/2792/2335/1282/284217/1284/7476/1288/3909/2535/1287/8900/332/5228/6513/3914/3655/1869/7040/3595/3675/5159/7424/26508/7477/5880/4313/5888/5888/3576/3559/898/2768/9002/3912/1164/6772/8772/3575/1029/1163/3910/2149/5293/7043/80326/4233/6773/5154/650/9134/182/675/3915/2264/1021/3594/5979/5743/5155/8323/6502/6775/2113/10681/578/2735/23566/54567/2057/5371/3685/3714/7185/3601/2737/588…
hsa04714	Thermogenesis	177	-0.411774	-1.60385	0.00187617	0.0231753	0.0165538	3952	tags=43%, list=26%, signal=33%	51703/2260/54539/5567/1351/4713/1352/6655/115/4714/6601/1340/1327/123096/4722/4722/4724/2181/4709/4695/5566/6197/84987/10975/29078/4707/2778/1329/51780/57492/1349/4696/4696/4696/4696/4696/4696/4696/4696/4696/4696/4720/4694/27089/7384/28958/4705/4705/4717/25915/51103/51422/4731/4697/7386/5606/9377/5603/4698/6194/57104/1376/6392/374291/148327/6196/1350/7385/7385/4881/6595/4719/4719/788/2180/112/660…
hsa04261	Adrenergic signaling in cardiomyocytes	104	-0.449105	-1.65271	0.0018315	0.0231753	0.0165538	2557	tags=24%, list=17%, signal=20%	3784/3784/5525/9252/5603/782/488/6330/5520/148327/5595/6324/7169/154/481/781/55799/596/112/816/4633/5332/111/108/7134/4625/477
hsa05012	Parkinson's disease	101	-0.463684	-1.69631	0.00184843	0.0231753	0.0165538	5081	tags=67%, list=34%, signal=45%	7318/4729/6390/4716/4700/4700/4700/4700/4700/4723/51079/29796/1347/7381/7314/7416/7326/7417/6391/4708/54539/5567/1351/4713/4714/1340/1327/4722/4722/4724/4709/4695/5566/10975/4707/1329/1349/4696/4696/4696/4696/4696/4696/4696/4696/4696/4696/4720/4694/27089/7384/4705/4705/4717/51465/293/4731/4697/842/7419/7386/9377/4698/6392/374291/65018/1350/7385/7385/2861/4719/4719/6622/2774/291/111/1346/120892
hsa00190	Oxidative phosphorylation	94	-0.480234	-1.73353	0.00185874	0.0231753	0.0165538	5000	tags=64%, list=33%, signal=43%	6390/4716/535/4700/4700/4700/4700/4700/4723/51079/29796/1355/1347/1353/7381/6391/4708/54539/1351/4713/1352/4714/1340/1327/4722/4722/4724/4709/4695/10975/527/27068/4707/1329/1349/4696/4696/4696/4696/4696/4696/4696/4696/4696/4696/4720/4694/64077/27089/7384/4705/4705/4717/4731/4697/7386/9377/4698/6392/374291/1350/7385/7385/4719/4719/155066/245973/1346/479/50617
hsa04925	Aldosterone synthesis and secretion	69	-0.485761	-1.66034	0.00744879	0.0441198	0.0315141	1720	tags=21%, list=11%, signal=19%	57118/4881/481/3708/3709/112/4929/3164/3991/816/5332/747/111/108/477
hsa01200	Carbon metabolism	97	-0.490442	-1.77282	0.00186916	0.0231753	0.0165538	3136	tags=46%, list=21%, signal=37%	3417/3030/5160/8803/2806/4524/1738/4594/4191/8802/4190/3098/3419/2203/9563/1892/847/1431/84693/6392/2747/5213/1737/35/4199/55902/5162/50/3418/414328/26275/1373/38/2805/8801/6470/34/5226/5095/26227/10873/4329/2027/84706/2875
hsa04530	Tight junction	133	-0.496793	-1.88124	0.00188679	0.0231753	0.0165538	2967	tags=35%, list=20%, signal=29%	8777/5516/4619/9693/5581/140465/51422/8531/153562/153562/64398/51421/10207/84612/7122/7074/4214/5520/653857/9368/56288/5602/92359/7082/7082/1741/50855/2064/58494/3993/4301/911/137075/137075/9223/9223/1366/4633/1364/57530/4629/4629/79784/100506658/100506658/5563/154796/4620/27134/84952
hsa04918	Thyroid hormone synthesis	49	-0.528921	-1.67947	0.00376648	0.028582	0.0204157	1286	tags=24%, list=9%, signal=22%	2936/3708/3709/2877/112/50506/405753/5332/111/108/2878/477
hsa04972	Pancreatic secretion	55	-0.560463	-1.82228	0.00376648	0.028582	0.0204157	1865	tags=35%, list=12%, signal=31%	488/81579/1131/5874/6558/481/3708/489/3709/112/50487/5332/111/108/5646/487/477/22802/5320
hsa04146	Peroxisome	69	-0.578794	-1.97833	0.0018622	0.0231753	0.0165538	4517	tags=64%, list=30%, signal=45%	6648/6648/8443/10654/5193/8799/51703/3155/55711/92960/2181/8504/23600/5191/5824/3417/11264/84188/4598/283927/26061/8800/373156/196743/55825/847/5189/1891/1891/54677/6342/3295/30/23417/8310/3418/51/5825/83594/2180/5264/1384/11001/2053/255027/255027
hsa00590	Arachidonic acid metabolism	42	-0.601778	-1.84942	0.00372439	0.028582	0.0204157	1121	tags=34%, list=7%, signal=32%	113612/2877/247/11145/50487/1573/4051/2053/5730/5740/239/1571/2878/5320
hsa00620	Pyruvate metabolism	32	-0.603261	-1.74957	0.00570342	0.0358501	0.0256072	3136	tags=59%, list=21%, signal=47%	2271/39/5160/1738/4191/4190/1737/4199/501/98/55902/5162/224/38/217/223/10873/32/197257
hsa00020	Citrate cycle (TCA cycle)	27	-0.618949	-1.7476	0.00743494	0.0441198	0.0315141	3633	tags=68%, list=24%, signal=52%	2271/48/4967/3417/5160/8803/1738/4191/8802/4190/3419/1431/6392/1737/5162/50/3418/8801
hsa04710	Circadian rhythm	28	-0.623044	-1.7789	0.00373134	0.028582	0.0204157	2530	tags=43%, list=17%, signal=36%	23291/9575/4862/8553/5187/1408/8863/8864/6095/5563/6097
hsa00280	Valine, leucine and isoleucine degradation	44	-0.658816	-2.03076	0.00186916	0.0231753	0.0165538	3136	tags=76%, list=21%, signal=60%	3030/56922/549/64087/64087/64087/3157/1629/1738/4594/5019/1892/10449/3712/84693/3032/30/35/501/593/27034/26275/224/3033/38/18/34/5095/594/217/223/4329/36/316
hsa00350	Tyrosine metabolism	19	-0.68135	-1.75102	0.00191939	0.0231753	0.0165538	1003	tags=57%, list=7%, signal=53%	2954/222/8639/2805/221/4128/220/316/4129/218/131
hsa00071	Fatty acid degradation	33	-0.690317	-2.01267	0.00190476	0.0231753	0.0165538	2172	tags=58%, list=14%, signal=49%	10449/1376/3032/30/35/501/8310/37/51/224/3033/38/2180/34/217/223/36/131
hsa00410	beta-Alanine metabolism	24	-0.699712	-1.92346	0.00186567	0.0231753	0.0165538	2172	tags=67%, list=14%, signal=57%	222/8639/501/23417/26275/57571/224/221/18/34/220/217/223/4329/218
hsa00640	Propanoate metabolism	28	-0.716368	-2.04535	0.00186567	0.0231753	0.0165538	3136	tags=72%, list=21%, signal=58%	3030/8803/1629/1738/4594/8802/1892/84693/55902/23417/593/26275/38/8801/18/34/5095/594/4329/32
hsa00650	Butanoate metabolism	16	-0.718632	-1.77812	0.0038835	0.028582	0.0204157	4060	tags=94%, list=27%, signal=69%	79944/3155/39/3030/3157/5019/1892/622/622/56898/35/3033/38/18/7915
hsa05204	Chemical carcinogenesis	30	-0.727918	-2.08848	0.0019084	0.0231753	0.0165538	2195	tags=63%, list=15%, signal=54%	222/6817/119391/2947/2948/4258/2941/221/2946/220/2052/1545/1562/1571/1577/218/131/4257
hsa00980	Metabolism of xenobiotics by cytochrome P450	26	-0.762344	-2.11282	0.0019084	0.0231753	0.0165538	2195	tags=69%, list=15%, signal=59%	222/119391/874/2947/2948/4258/2941/221/2946/220/2052/1545/1571/1577/218/131/4257
hsa00982	Drug metabolism - cytochrome P450	27	-0.805254	-2.27364	0.00185874	0.0231753	0.0165538	1122	tags=81%, list=7%, signal=76%	222/119391/2947/2948/2328/4258/2941/221/4128/2946/2330/220/2326/316/1571/1577/4129/218/131/4257/2327
hsa00340	Histidine metabolism	16	-0.830217	-2.05422	0.00194175	0.0231753	0.0165538	1514	tags=75%, list=10%, signal=68%	501/57571/224/221/4128/220/217/223/3176/4129/218
